# Supplementary material for: Comparative effectiveness of TNF inhibitor vs IL-6 receptor inhibitor as monotherapy or combination therapy with methotrexate in biologic-experienced patients with rheumatoid arthritis: An analysis from the CorEvitas RA Registry
Source: Springer Nature journal article supplement (doi:10.1007/s10067-023-06588-7), 2023-04-15
Supplement: MOESM1 [file 25246632]

## CLINICAL RHEUMATOLOGY

### **Comparative effectiveness of TNF inhibitor vs IL-6 receptor inhibitor as monotherapy or combination therapy with methotrexate in biologic-experienced patients with rheumatoid arthritis: An analysis from the CorEvitas RA Registry**

Anthony Sebba (ID: 0000-0002-3028-9365),<sup>1</sup> Clifton O Bingham (ID: 0000-0002-4752-5029),<sup>2</sup> Vivian P Bykerk (ID: 0000-0002-1219-3845),<sup>3</sup> Stefano Fiore (ID: 0000-0002-3785-2448),<sup>4</sup> Kerri Ford,<sup>5</sup> Jud C Janak,<sup>6\*</sup> Dimitrios A Pappas (ID: 0000-0001-8338-027X),<sup>6,7</sup> Taylor Blachley,<sup>6\*</sup> Swapna S Dave,<sup>6\*</sup> Joel M Kremer (ID: 0000-0001-6674-9901),<sup>6,8</sup> Miao Yu,<sup>6</sup> Ernest Choy (ID: 0000-0003-4459-8609)<sup>9</sup>

<sup>1</sup>Department of Rheumatology, University of South Florida, Tampa, Florida, United States of America

<sup>2</sup>Division of Rheumatology, Johns Hopkins University, Baltimore, Maryland, United States of America

<sup>3</sup>Inflammatory Arthritis Center, Hospital for Special Surgery, New York, NY, United States of America

<sup>4</sup>Medical Affairs, Sanofi, Bridgewater, New Jersey, United States of America

<sup>5</sup>Medical Affairs, Sanofi, Cambridge, Massachusetts, United States of America

<sup>6</sup>CorEvitas, LLC, Waltham, Massachusetts, United States of America

<sup>7</sup>Division of Rheumatology, Columbia University, New York, NY, United States of America

<sup>8</sup>Department of Medicine, Center for Rheumatology, Albany Medical College, Albany, New York, United States of America

<sup>9</sup>CREATE Centre, Division of Infection and Immunity, Cardiff University, Wales, United Kingdom

*\*Affiliation at the time of study.*

**Corresponding author:** Anthony Sebba; email ID: [anthonysebba@gmail.com](mailto:anthonysebba@gmail.com)

## SUPPLEMENTARY MATERIAL

**Online Supplementary Table 1** Sensitivity analysis: Results from mixed models evaluating the impact of treatment class on disease burden, disproportionate pain, and disease activity among monotherapy initiators

| Outcomes                                                    | Six-month mean (SD)/response rate |                 | $\beta^c$ | Unadjusted <sup>a</sup> |             | $\beta^c$ | Adjusted <sup>b</sup> |             |
|-------------------------------------------------------------|-----------------------------------|-----------------|-----------|-------------------------|-------------|-----------|-----------------------|-------------|
|                                                             | TNFi                              | IL-6Ri          |           | OR <sup>c</sup>         | 95% CI      |           | OR <sup>c</sup>       | 95% CI      |
| Disease activity                                            |                                   |                 |           |                         |             |           |                       |             |
| CDAI                                                        | 19.2 (13.1)                       | 19.7 (13.6)     | -0.64     | –                       | -2.15, 0.87 | -0.92     | –                     | -2.51, 0.68 |
| Achievement of LDA                                          | 200/732 (27.3%)                   | 79/283 (27.9%)  | –         | 1.15                    | 0.75, 1.74  | –         | 1.31                  | 0.86, 2.00  |
| Achievement of remission                                    | 42/732 (5.7%)                     | 18/283 (6.4%)   | –         | 2.12                    | 0.26, 17.17 | –         | 2.11                  | 0.21, 20.71 |
| Achievement of MCID in CDAI                                 | 248/732 (33.9%)                   | 108/283 (38.2%) | –         | 1.19                    | 0.81, 1.75  | –         | 1.24                  | 0.82, 1.86  |
| Disease burden                                              |                                   |                 |           |                         |             |           |                       |             |
| HAQ-DI                                                      | 1.0 (0.7)                         | 1.2 (0.7)       | 0.02      | –                       | -0.04, 0.08 | 0.01      | –                     | -0.06, 0.07 |
| HAQ-DI improvement $\geq 0.22$                              | 195/678 (28.8%)                   | 96/268 (35.8%)  | –         | 1.31                    | 0.89, 1.93  | –         | 1.42                  | 0.92, 2.21  |
| HAQ-DI improvement $\geq 0.30$                              | 149/678 (22.0%)                   | 67/268 (25.0%)  | –         | 1.03                    | 0.66, 1.60  | –         | 1.12                  | 0.71, 1.78  |
| Pain VAS                                                    | 51.4 (28.2)                       | 51.9 (27.9)     | -0.88     | –                       | -4.01, 2.26 | -1.88     | –                     | -5.16, 1.40 |
| Pain VAS improvement $\geq 10$                              | 256/735 (34.8%)                   | 112/286 (39.2%) | –         | 1.18                    | 0.83, 1.67  | –         | 1.24                  | 0.85, 1.82  |
| Patient global assessment VAS                               | 49.4 (26.3)                       | 48.9 (26.6)     | -1.33     | –                       | -4.26, 1.59 | -2.77     | –                     | -5.83, 0.28 |
| Patient global assessment VAS improvement $\geq 10$         | 258/735 (35.1%)                   | 125/286 (43.7%) | –         | 1.47                    | 1.04, 2.09  | –         | 1.62                  | 1.12, 2.35  |
| Fatigue VAS                                                 | 53.4 (28.7)                       | 54.2 (28.5)     | 0.79      | –                       | -2.22, 3.81 | 0.44      | –                     | -2.70, 3.58 |
| Fatigue VAS improvement $\geq 10$                           | 208/677 (30.7%)                   | 82/267 (30.7%)  | –         | 0.98                    | 0.69, 1.41  | –         | 1.02                  | 0.69, 1.50  |
| EQ-5D                                                       | 0.7 (0.2)                         | 0.7 (0.2)       | 0.02      | –                       | -0.01, 0.04 | 0.02      | –                     | -0.00, 0.05 |
| DP                                                          |                                   |                 |           |                         |             |           |                       |             |
| DP <sub>1</sub> : All initiators                            | 127/734 (17.3%)                   | 52/283 (18.4%)  | –         | 1.18                    | 0.26, 5.47  | –         | 1.25                  | 0.44, 3.55  |
| DP <sub>1</sub> at baseline, no DP <sub>1</sub> at 6 months | 69/163 (42.3%)                    | 26/64 (40.6%)   | –         | 0.84                    | 0.30, 2.39  | –         | 0.98                  | 0.35, 2.78  |
| DP <sub>2</sub> : All initiators                            | 236/585 (40.3%)                   | 84/221 (38.0%)  | –         | 0.86                    | 0.52, 1.42  | –         | 0.91                  | 0.52, 1.57  |
| DP <sub>2</sub> at baseline, no DP <sub>2</sub> at 6 months | 35/201 (17.4%)                    | 11/71 (15.5%)   | –         | 0.77                    | 0.21, 2.82  | –         | 0.41                  | 0.08, 2.25  |

<sup>a</sup>Unadjusted models include treatment indicators and baseline value of outcome as independent variables. <sup>b</sup>Adjusted models include treatment indicators, baseline value of outcome, and covariates specified in the covariate list and those identified to be significantly different in baseline table (covariates of monotherapy initiators: biologic line of therapy, age, duration of RA, gender, work status, history of CVD, CDAI, and morning stiffness; covariates of combination therapy initiators: biologic line of therapy, history of CVD, CDAI, patient reported pain, prior use of csDMARDs, and opioids use.). <sup>c</sup>Based on unadjusted and covariate-adjusted regression analyses ( $\beta$  [95% CI] for linear regressions and OR [95% CI] for logistic regressions) using TNFi group as the reference;  $\beta$  represents the expected difference in the mean change of outcomes from baseline to 6 months for IL-6Ri group compared to TNFi group.

CDAI, clinical disease activity index; csDMARDs, conventional synthetic disease modifying anti-rheumatic drugs; CI, confidence interval; CVD, cardiovascular disease; DP, disproportionate pain; EQ-5D, EuroQol-5 Dimension score; HAQ-DI, Health Assessment Questionnaire-Disability Index; IL-6Ri, interleukin-6 receptor inhibitor; LDA, low disease activity; MCID, minimal clinically important difference; OR, odds ratio; RA, rheumatoid arthritis; SD, standard deviation; TNFi, tumor necrosis factor inhibitor; VAS, visual analog scale.

**Online Supplementary Table 2** Sensitivity analysis: Results from mixed models evaluating the impact of treatment class on disease burden, disproportionate pain, and disease activity among combination therapy initiators

| Outcomes                                                    | Six-month mean (SD)/response rate |                 | Unadjusted <sup>a</sup> |                 |             | Adjusted <sup>b</sup> |                 |             |
|-------------------------------------------------------------|-----------------------------------|-----------------|-------------------------|-----------------|-------------|-----------------------|-----------------|-------------|
|                                                             | TNFi                              | IL-6Ri          | $\beta^c$               | OR <sup>c</sup> | 95% CI      | $\beta^c$             | OR <sup>c</sup> | 95% CI      |
| Disease activity                                            |                                   |                 |                         |                 |             |                       |                 |             |
| CDAI                                                        | 17.9 (12.7)                       | 19.5 (13.1)     | 0.60                    | –               | -0.65, 1.84 | 0.03                  | –               | -1.25, 1.31 |
| Achievement of LDA                                          | 404/1303 (31.0%)                  | 109/399 (27.3%) | –                       | 0.89            | 0.68, 1.18  | –                     | 1.02            | 0.77, 1.35  |
| Achievement of remission                                    | 95/1303 (7.3%)                    | 29/399 (7.3%)   | –                       | 1.07            | 0.69, 1.65  | –                     | 1.33            | 0.84, 2.10  |
| Achievement of MCID in CDAI                                 | 501/1303 (38.4%)                  | 160/399 (40.1%) | –                       | 1.00            | 0.79, 1.27  | –                     | 1.07            | 0.83, 1.37  |
| Disease burden                                              |                                   |                 |                         |                 |             |                       |                 |             |
| HAQ-DI                                                      | 1.0 (0.7)                         | 1.1 (0.7)       | 0.02                    | –               | -0.03, 0.07 | 0.01                  | –               | -0.04, 0.06 |
| HAQ-DI improvement $\geq 0.22$                              | 367/1169 (31.4%)                  | 117/382 (30.6%) | –                       | 0.91            | 0.69, 1.20  | –                     | 0.95            | 0.72, 1.26  |
| HAQ-DI improvement $\geq 0.30$                              | 274/1169 (23.4%)                  | 91/382 (23.8%)  | –                       | 0.97            | 0.73, 1.30  | –                     | 1.07            | 0.80, 1.44  |
| Pain VAS                                                    | 46.2 (28.1)                       | 49.1 (27.2)     | 1.15                    | –               | -1.43, 3.72 | 0.50                  | –               | -2.16, 3.16 |
| Pain VAS improvement $\geq 10$                              | 524/1309 (40.0%)                  | 152/401 (37.9%) | –                       | 0.84            | 0.65, 1.09  | –                     | 0.88            | 0.68, 1.15  |
| Patient global assessment VAS                               | 43.6 (26.5)                       | 46.1 (26.6)     | 0.58                    | –               | -1.93, 3.08 | 0.17                  | –               | -2.39, 2.73 |
| Patient global assessment VAS improvement $\geq 10$         | 544/1307 (41.6%)                  | 167/401 (41.6%) | –                       | 0.92            | 0.72, 1.18  | –                     | 0.97            | 0.75, 1.26  |
| Fatigue VAS                                                 | 48.0 (29.1)                       | 49.1 (29.0)     | -1.10                   | –               | -3.70, 1.50 | -1.26                 | –               | -3.92, 1.40 |
| Fatigue VAS improvement $\geq 10$                           | 405/1166 (34.7%)                  | 147/380 (38.7%) | –                       | 1.14            | 0.85, 1.52  | –                     | 1.16            | 0.85, 1.57  |
| EQ-5D                                                       | 0.7 (0.2)                         | 0.7 (0.2)       | 0.00                    | –               | -0.02, 0.02 | 0.00                  | –               | -0.02, 0.02 |
| DP                                                          |                                   |                 |                         |                 |             |                       |                 |             |
| DP <sub>1</sub> : All initiators                            | 174/1311 (13.3%)                  | 74/399 (18.5%)  | –                       | 1.54            | 1.07, 2.22  | –                     | 1.34            | 0.93, 1.93  |
| DP <sub>1</sub> at baseline, no DP <sub>1</sub> at 6 months | 140/259 (54.1%)                   | 41/87 (47.1%)   | –                       | 0.62            | 0.26, 1.46  | –                     | 0.73            | 0.32, 1.69  |
| DP <sub>2</sub> : All initiators                            | 329/1021 (32.2%)                  | 127/324 (39.2%) | –                       | 1.37            | 0.99, 1.88  | –                     | 1.29            | 0.92, 1.80  |
| DP <sub>2</sub> at baseline, no DP <sub>2</sub> at 6 months | 91/297 (30.6%)                    | 27/105 (25.7%)  | –                       | 0.69            | 0.31, 1.52  | –                     | 0.78            | 0.34, 1.80  |

<sup>a</sup>Unadjusted models include treatment indicators and baseline value of outcome as independent variables. <sup>b</sup>Adjusted models include treatment indicators, baseline value of outcome, and covariates specified in the covariate list and those identified to be significantly different in baseline table (covariates of monotherapy initiators: biologic line of therapy, age, duration of RA, gender, work status, history of CVD, CDAI, and morning stiffness; covariates of combination therapy initiators: biologic line of therapy, history of CVD, CDAI, patient reported pain, prior use of csDMARDs, and opioids use.). <sup>c</sup>Based on unadjusted and covariate-adjusted regression analyses ( $\beta$  [95% CI] for linear regressions and OR [95% CI] for logistic regressions) using TNFi group as the reference;  $\beta$  represents the expected difference in the mean change of outcomes from baseline to 6 months for IL-6i group compared to TNFi group.

CDAI, clinical disease activity index; csDMARDs, conventional synthetic disease modifying anti-rheumatic drugs; CI, confidence interval; CVD, cardiovascular disease; DP, disproportionate pain; EQ-5D, EuroQol-5 Dimension score; HAQ-DI, Health Assessment Questionnaire-Disability Index; IL-6i, interleukin-6 receptor inhibitor; LDA, low disease activity; MCID, minimal clinically important difference; OR, odds ratio; RA, rheumatoid arthritis; SD, standard deviation; TNFi, tumor necrosis factor inhibitor; VAS, visual analog scale.

**Online Supplementary Table 3** Prednisone use category at six-month follow-up by prednisone use category at initiation

| Prednisone use at 6 months            | Prednisone use at initiation, <i>N</i> (%) <sup>a</sup> |             |             |
|---------------------------------------|---------------------------------------------------------|-------------|-------------|
|                                       | No use                                                  | Dose <10 mg | Dose ≥10 mg |
| TNFi monotherapy initiators           | 515                                                     | 147         | 67          |
| No use                                | 463 (90)                                                | 43 (29)     | 13 (19)     |
| Dose <10 mg                           | 40 (8)                                                  | 100 (68)    | 14 (21)     |
| Dose ≥10 mg                           | 12 (2)                                                  | 4 (3)       | 40 (60)     |
| TNFi combination therapy initiators   | 920                                                     | 258         | 106         |
| No use                                | 836 (91)                                                | 62 (24)     | 30 (28)     |
| Dose <10 mg                           | 61 (7)                                                  | 187 (72)    | 22 (21)     |
| Dose ≥10 mg                           | 23 (3)                                                  | 9 (3)       | 54 (51)     |
| IL-6Ri monotherapy initiators         | 189                                                     | 49          | 46          |
| No use                                | 170 (90)                                                | 11 (22)     | 10 (22)     |
| Dose <10 mg                           | 12 (6)                                                  | 33 (67)     | 7 (15)      |
| Dose ≥10 mg                           | 7 (4)                                                   | 5 (10)      | 29 (63)     |
| IL-6Ri combination therapy initiators | 258                                                     | 92          | 42          |
| No use                                | 242 (94)                                                | 25 (27)     | 9 (21)      |
| Dose <10 mg                           | 11 (4)                                                  | 63 (68)     | 7 (17)      |
| Dose ≥10 mg                           | 5 (2)                                                   | 4 (4)       | 26 (62)     |

<sup>a</sup>Sample size for prednisone use calculation excludes those in “Current use, missing dose” category at baseline and/or six-month follow-up.

IL-6Ri, interleukin-6 receptor inhibitor; TNFi, tumor necrosis factor inhibitor.

**Online Supplementary Table 4** Sensitivity analysis: Prednisone use category at six-month follow-up by prednisone use category at initiation

| Prednisone use at 6 months            | Prednisone use at initiation, <i>N</i> (%) |             |             |
|---------------------------------------|--------------------------------------------|-------------|-------------|
|                                       | No use                                     | Dose <10 mg | Dose ≥10 mg |
| TNFi monotherapy initiators           | 495                                        | 139         | 59          |
| No use                                | 463 (94)                                   | 43 (31)     | 13 (22)     |
| Dose <10 mg                           | 29 (6)                                     | 87 (63)     | 11 (19)     |
| Dose ≥10 mg                           | 3 (1)                                      | 9 (6)       | 35 (59)     |
| TNFi combination therapy initiators   | 889                                        | 255         | 105         |
| No use                                | 836 (94)                                   | 62 (24)     | 30 (29)     |
| Dose <10 mg                           | 43 (5)                                     | 184 (72)    | 26 (25)     |
| Dose ≥10 mg                           | 10 (1)                                     | 9 (4)       | 49 (47)     |
| IL-6Ri monotherapy initiators         | 186                                        | 48          | 45          |
| No use                                | 170 (91)                                   | 11 (23)     | 10 (22)     |
| Dose <10 mg                           | 11 (6)                                     | 32 (67)     | 6 (13)      |
| Dose ≥10 mg                           | 5 (3)                                      | 5 (10)      | 29 (64)     |
| IL-6Ri combination therapy initiators | 253                                        | 91          | 41          |
| No use                                | 242 (96)                                   | 25 (27)     | 9 (22)      |
| Dose <10 mg                           | 7 (3)                                      | 63 (69)     | 6 (15)      |
| Dose ≥10 mg                           | 4 (2)                                      | 3 (3)       | 26 (63)     |

IL-6Ri, interleukin-6 receptor inhibitor; TNFi, tumor necrosis factor inhibitor.
